# Supplementary material
Source: HighWire-hosted journal article supplement (https://www.jrheum.org/highwire/filestream/38523/field_highwire_adjunct_files/0/191291DataSuppl.pdf)

**ONLINE SUPPLEMENTARY MATERIAL**

**Supplementary Data 1.**

**Table 1. The OMERACT Ultrasound Scanning Methods in Knee Osteoarthritis**

| Scoring for          | Range        | Location                               | Patient Position                           | Scanning Plane                      |
|----------------------|--------------|----------------------------------------|--------------------------------------------|-------------------------------------|
| Synovitis            | 0-3          | Suprapatellar recess                   | Supine with the knee flexed 30°            | Longitudinal<br>(lateral to medial) |
|                      |              | Medial and lateral parapatellar recess | Supine with the knee in a neutral position | Transverse<br>(proximal to distal)  |
| Synovial hypertrophy | Each for 0-1 | Suprapatellar recess                   | Supine with the knee flexed 30°            | Longitudinal<br>(lateral to medial) |
| Effusion             |              | Medial and lateral parapatellar recess | Supine with the knee in a neutral position | Transverse<br>(proximal to distal)  |
| Synovial PD signal   |              |                                        |                                            |                                     |
| Cartilage damage     | 0-3          | Trochlear cartilage                    | Supine with full flexion of the knee.      | Transverse<br>(lateral to medial)   |
| Meniscal damage      | 0-2          | medial horn of the medial meniscus     | supine with the knee flexed 10°            | longitudinal                        |
| Osteophytes          | 0-3          | Medial and lateral femorotibial space  | supine with the knee flexed 10°            | longitudinal                        |

PD=Power Doppler

Modified from the original table with permission from Wolters Kluwer Health, Inc.<sup>4</sup>

**Table 2. Definitions of OMERACT Grading of Ultrasound Pathologies in Knee Osteoarthritis**

| <b>Pathology</b>     | <b>Grade 0</b>          | <b>Grade 1</b>                                                                                                                                                                                                   | <b>Grade 2</b>                                                                                                                                                                  | <b>Grade 3</b>                                                                                                                                                        |
|----------------------|-------------------------|------------------------------------------------------------------------------------------------------------------------------------------------------------------------------------------------------------------|---------------------------------------------------------------------------------------------------------------------------------------------------------------------------------|-----------------------------------------------------------------------------------------------------------------------------------------------------------------------|
| Synovitis            | no synovitis            | minimal distension of the recess by abnormal internal hypoechoic or anechoic (relative to subdermal fat tissue) material                                                                                         | moderate distension or enlargement of the recess by abnormal internal hypoechoic or anechoic (relative to subdermal fat tissue) material with flat or concave superficial limit | severe distension or enlargement of the recess by abnormal internal hypoechoic or anechoic (relative to subdermal fat tissue) material with bulging superficial limit |
| Synovial hypertrophy | No synovial hypertrophy | Abnormal hypoechoic (relative to subdermal fat, but sometimes may be isoechoic or hyperechoic) intraarticular tissue that is non displaceable and poorly compressible and which may exhibit Doppler signal > 4mm |                                                                                                                                                                                 |                                                                                                                                                                       |
| Effusion             | No effusion             | Abnormal hypoechoic or anechoic (relative to subdermal fat, but sometimes may be isoechoic or hyperechoic) intraarticular material                                                                               |                                                                                                                                                                                 |                                                                                                                                                                       |

|                    |                                                                                       |                                                                                                   |                                                                                   |                                                                                 |
|--------------------|---------------------------------------------------------------------------------------|---------------------------------------------------------------------------------------------------|-----------------------------------------------------------------------------------|---------------------------------------------------------------------------------|
|                    |                                                                                       | that is displaceable and compressible, but does not exhibit Doppler signal >4mm                   |                                                                                   |                                                                                 |
| Power Doppler      | no colour was observed in the synovium                                                | single colour signals were observed (up to 3) in the synovium                                     |                                                                                   |                                                                                 |
| Cartilage          | normal                                                                                | irregularities or loss of sharpness of superficial and/or deep cartilage margins without thinning | partial or complete loss of thickness of the cartilage in one trochlear facet     | partial or complete loss of thickness of the cartilage in both trochlear facets |
| Meniscal extrusion | hyperechoic triangle with the outer edge at the level of the femorotibial joint space | hyperechoic triangle protruded, ie, partially out of the femorotibial joint space                 | hyperechoic triangle extruded, ie, completely out of the femorotibial joint space |                                                                                 |
| Osteophyte         | no osteophytes, i.e. a smooth cortical surface.                                       | small and distinct cortical protrusion(s) of the bony surface.                                    | larger protrusion(s) of the bony surface.                                         | very large protrusion(s) of the bony surface                                    |

Modified from the original table with permission from Wolters Kluwer Health, Inc.<sup>4</sup>

**Supplementary Data 2.**

**Table 1. MRI sequences for RESTORE knee study using knee coil.**

| MRI Sequence            | Slices | Slice thickness (mm) | Slice Gap (mm) | Phase Encoding | Scan time | lpat | Resolution                  | Turbo Factor (TSE) | Voxel size                      | TR    | TE | Averages (NSA) | Bandwidth | Fat Sat |
|-------------------------|--------|----------------------|----------------|----------------|-----------|------|-----------------------------|--------------------|---------------------------------|-------|----|----------------|-----------|---------|
| PD FS Sag               | 40     | 2.2                  | 0.2            | H>F            | 2.36      | 2    | 307x384                     | 7                  | 0.4x0.4 x2.2                    | 3500  | 38 | 2              | 200       | Yes     |
| Ax PD FS                | 40     | 2.5                  | 0.3            | R>L            | 3.12      | 2    | 384x278                     | 7                  | 0.4x0.4 x2.5                    | 4170  | 30 | 2              | 221       | Yes     |
| PD Cor                  | 40     | 2.5                  | 0.3            | R>L            | 1.59      | 2    | 358x448                     | 7                  | 0.3x0.3 x2.5                    | 3300  | 38 | 1              | 222       | No      |
| PD FS Cor               | 40     | 2.5                  | 0.3            | R>L            | 1.59      | 2    | 307x384                     | 7                  | 0.4x0.4 x2.5                    | 3600  | 36 | 1              | 224       | Yes     |
| T1 3D Gradient DESS Sag | 192    | 0.6                  |                | A>P            | 6.32      | 2    | 265<br>95%phase<br>90%slice | -                  | Acq & Rec<br>0.66x0.<br>63x0.66 | 14.10 | 5  | 2              | 250       | Yes     |

**Ax=Axial; Cor=Coronal; MRI=Magnetic resonance imaging; PD=proton density; FS=fat saturation; DESS=Dual echo steady state; Sag=Sagittal; TE= Echo time; TR=Repitition time; TSE= Turbo spin echo**

**Supplementary Data 3.**

**Table 1. The intra-reader and inter-reader reliability of MOAKS score in knee OA**

| MOAKS              | Intra-rater reliability (Kappa) | Percent agreement | Inter-rater reliability (Kappa) | Percent agreement |
|--------------------|---------------------------------|-------------------|---------------------------------|-------------------|
| Cartilage Area F   | 0.82(0.46 to 1.00)              | 90                | 0.77(0.30 to 1.00)              | 90                |
| Cartilage Area T   | 0.64(0.30 to 0.98)              | 80                | 0.42(-0.01 to 0.85)             | 70                |
| Cartilage Area P   | 0.89(0.68 to 1.00)              | 90                | 0.90(0.75 to 1.00)              | 90                |
| Cartilage Depth F  | 0.90(0.71 to 1.00)              | 90                | 0.69(0.39 to 1.00)              | 70                |
| Cartilage Depth T  | 0.66(0.37 to 0.94)              | 60                | 0.53(0.21 to 0.85)              | 50                |
| Cartilage Depth P  | 0.67(0.36 to 0.97)              | 60                | 0.60(0.24 to 0.97)              | 60                |
| MME                | 0.92(0.75 to 1.00)              | 90                | 0.83(0.62 to 1.00)              | 80                |
| LME                | 0.68(0.24 to 1.00)              | 80                | 0.26(-0.06 to 0.58)             | 80                |
| Osteophyte F       | 0.69(0.33 to 1.00)              | 80                | 0.77 (0.30 to 1.00)             | 80                |
| Osteophyte T       | 0.66(0.31 to 1.00)              | 70                | 0.45(0.09 to 0.82)              | 60                |
| Osteophyte P       | 0.79(0.54 to 1.00)              | 80                | 0.63(0.22 to 1.00)              | 80                |
| effusion synovitis | 0.91(0.74 to 1.00)              | 90                | 0.80(0.56 to 1.00)              | 80                |
| Hoffa synovitis    | 0.83(0.55 to 1.00)              | 90                | 0.50(0.044 to 0.96)             | 70                |

F=Femur; IPB=Infra-patella Bursitis; LME=Lateral meniscal extrusion; MME= Medial meniscal extrusion; P=Patella; T=Tibia;

**Supplementary Data 4.**

**Plots of gradings of ultrasound pathologies vs radiographic KL grades**

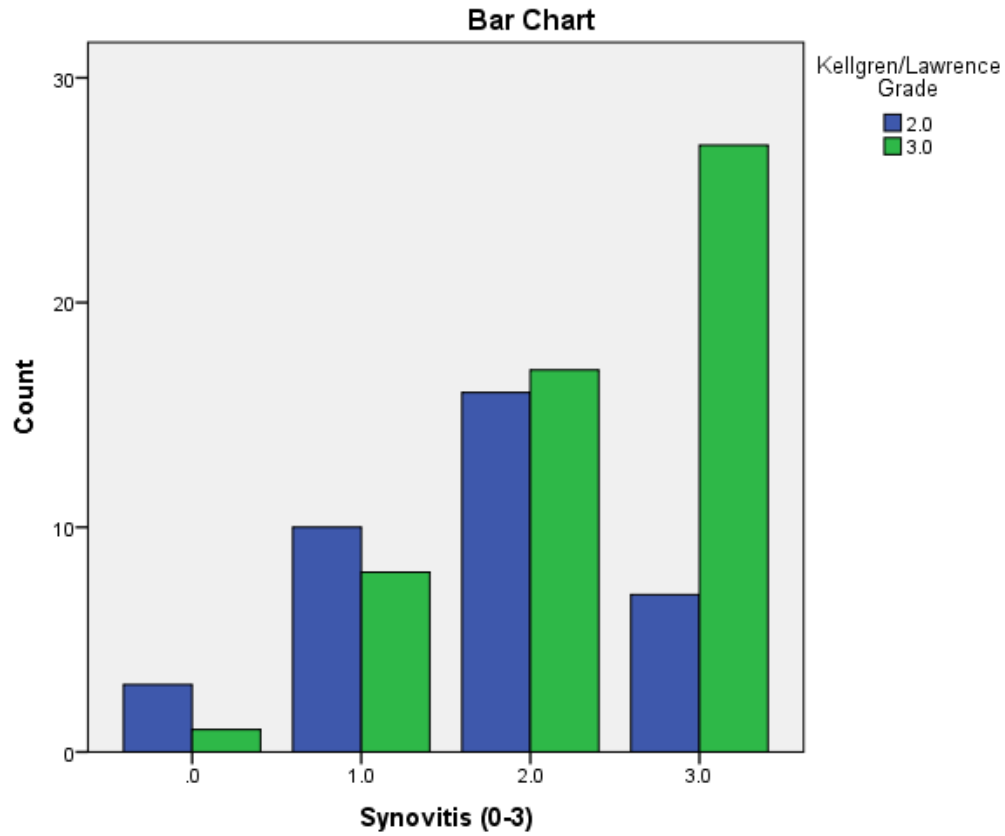

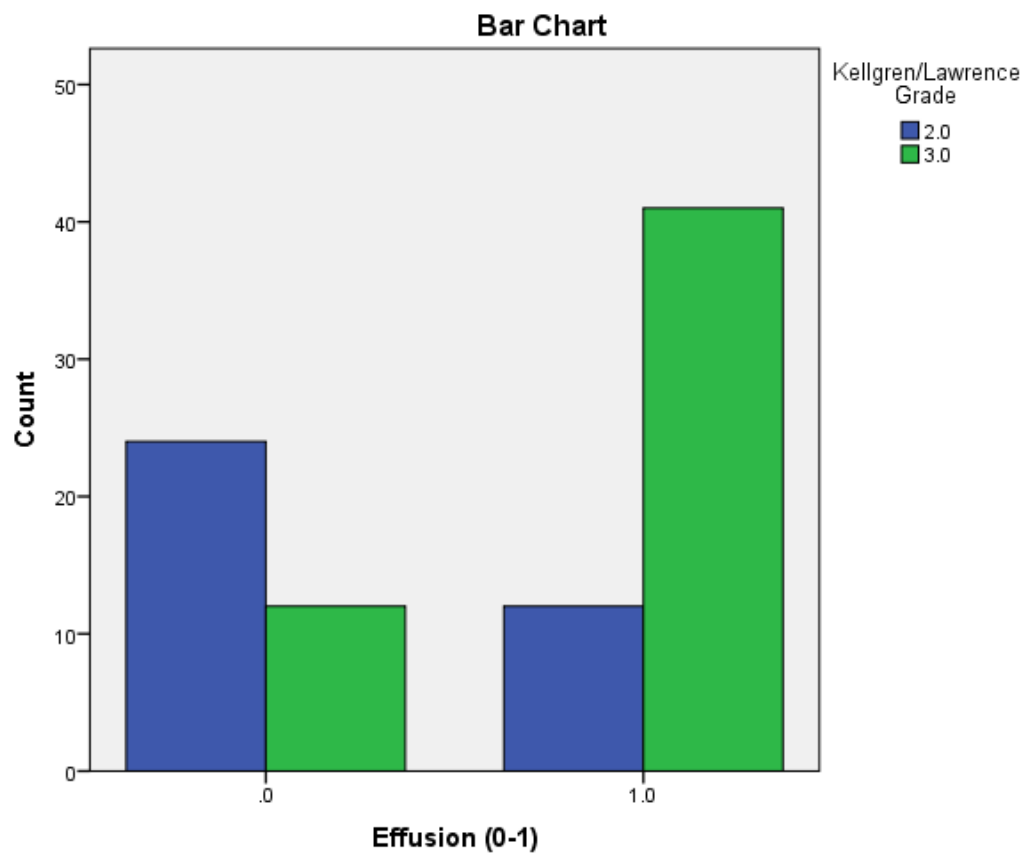

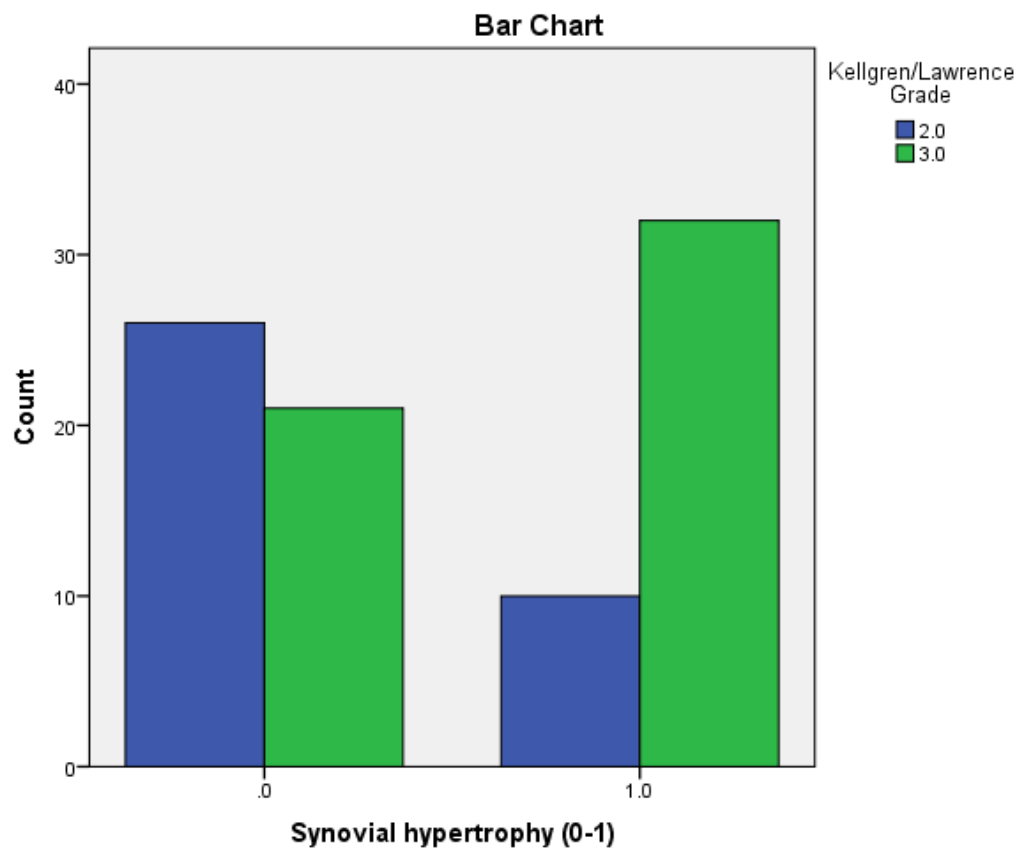



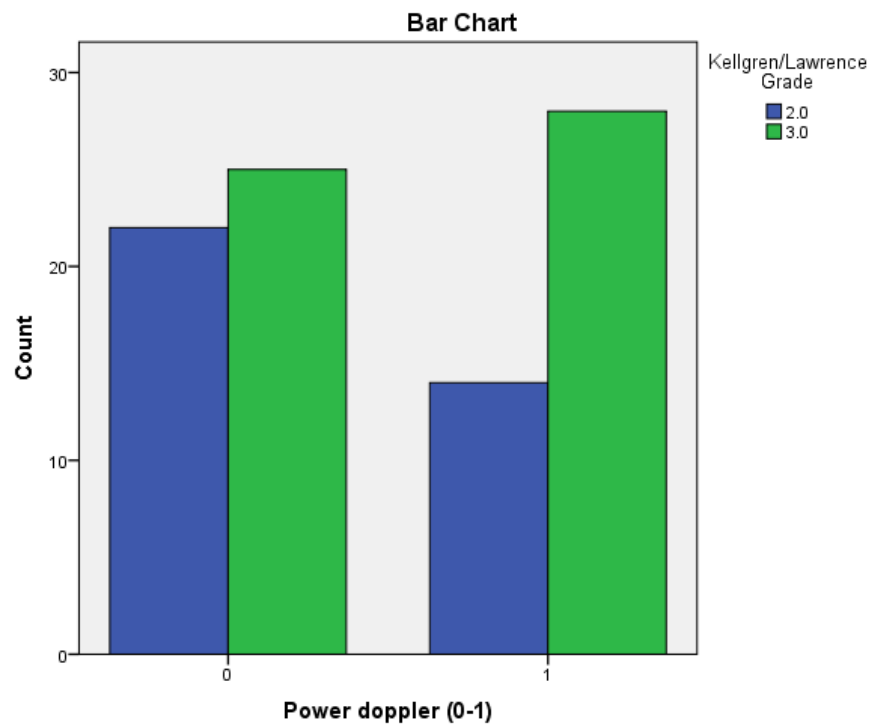

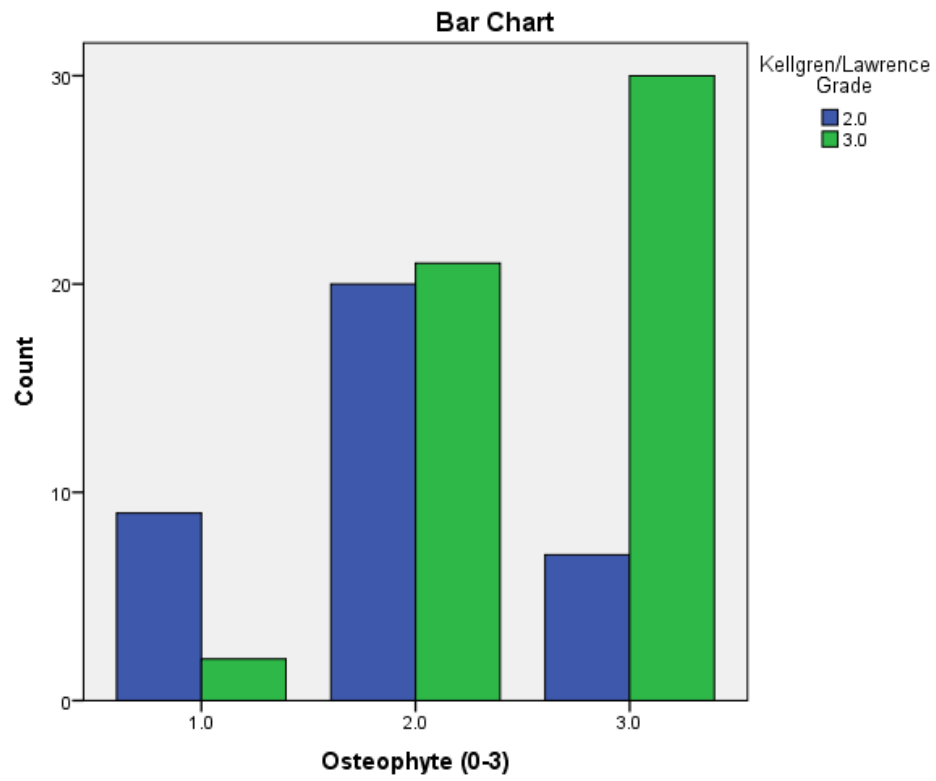

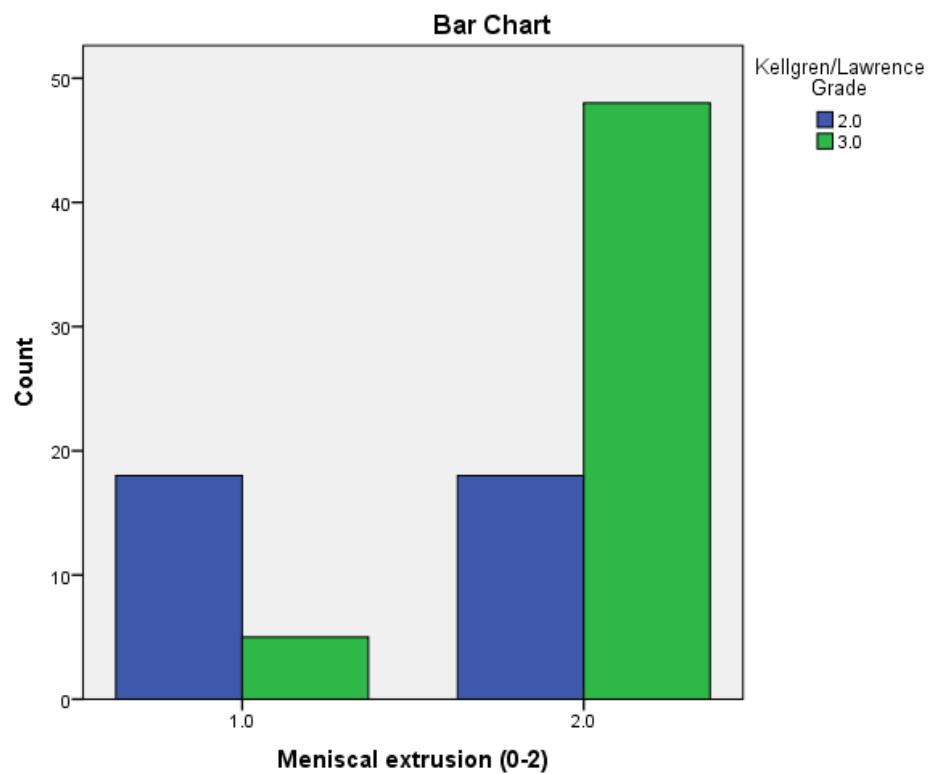

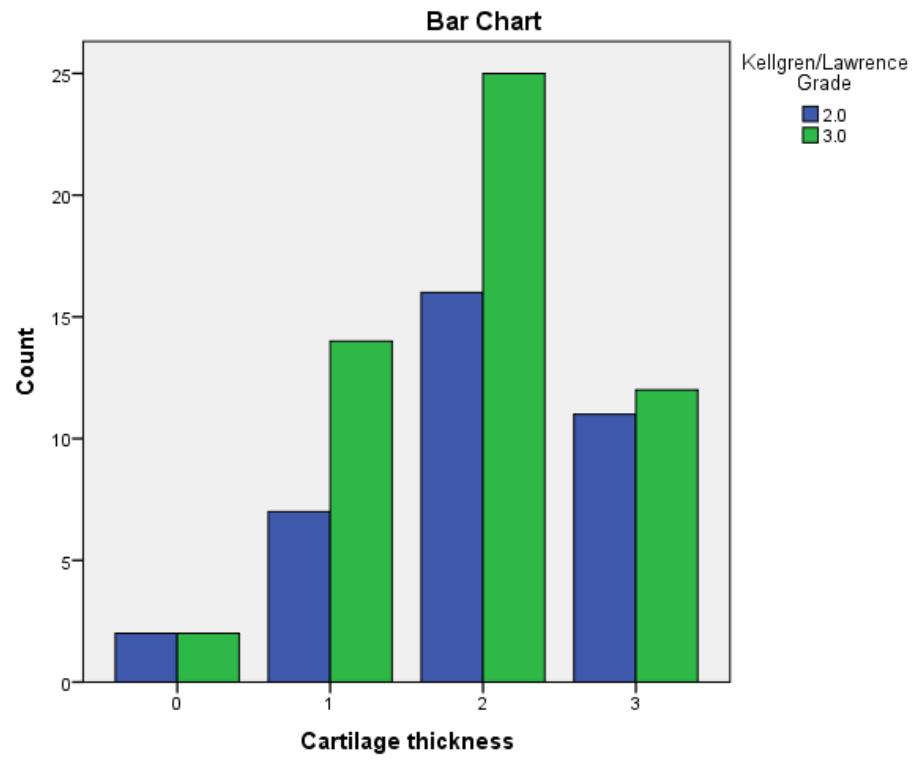

**Supplementary Data 5.**

**Plot of grading of ultrasound pathologies vs MOAKS counterparts**

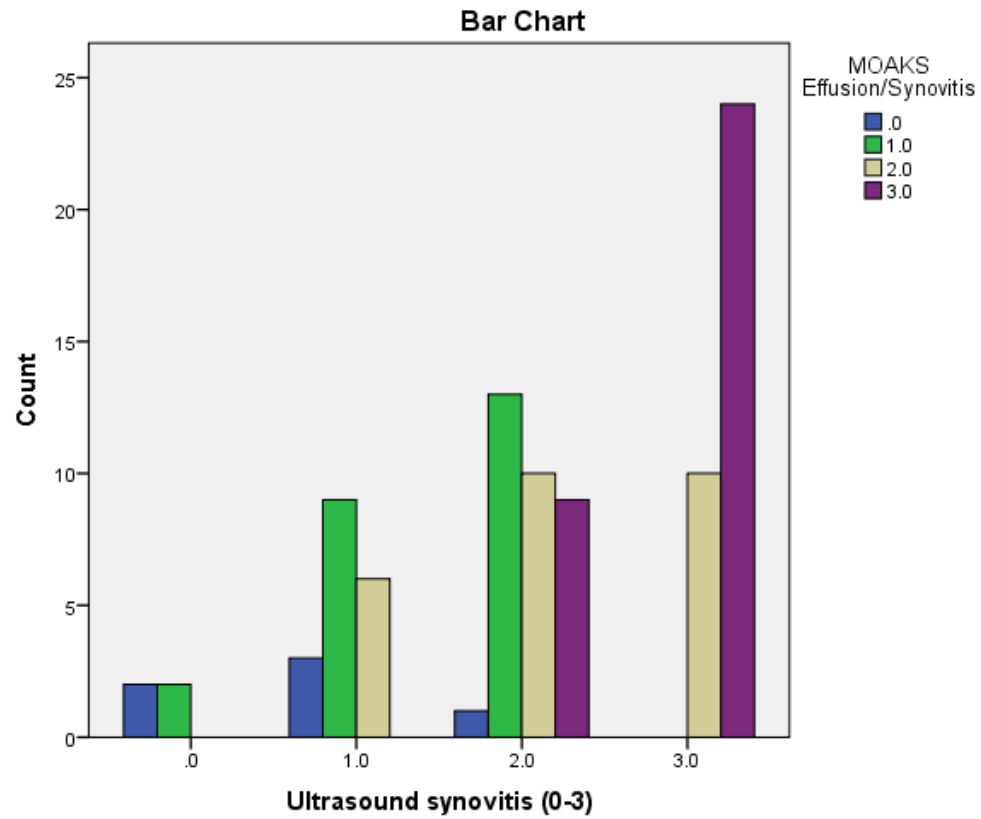

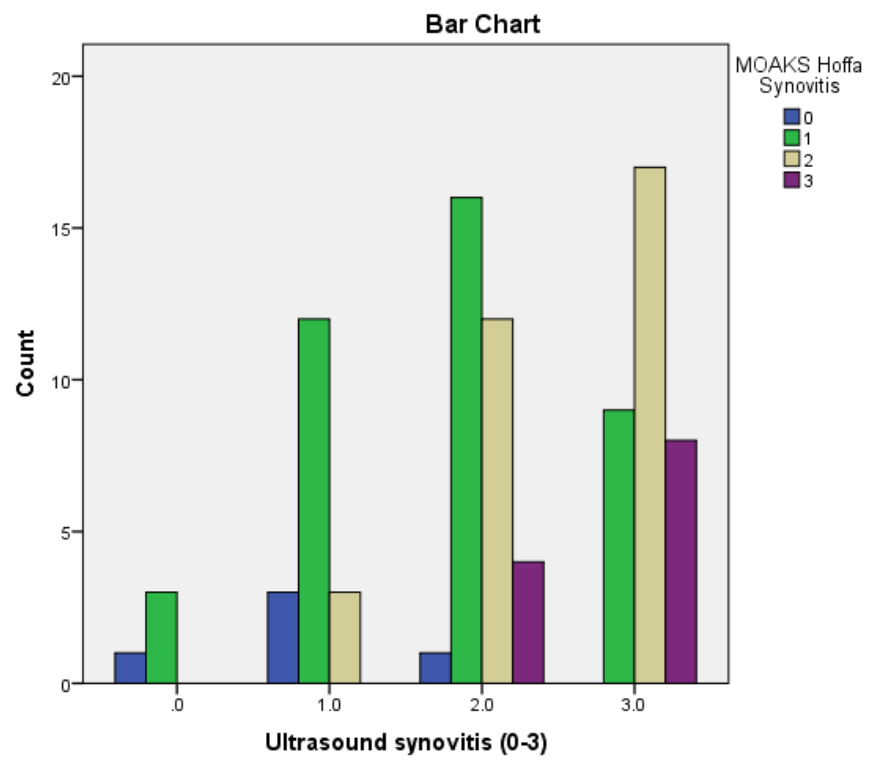

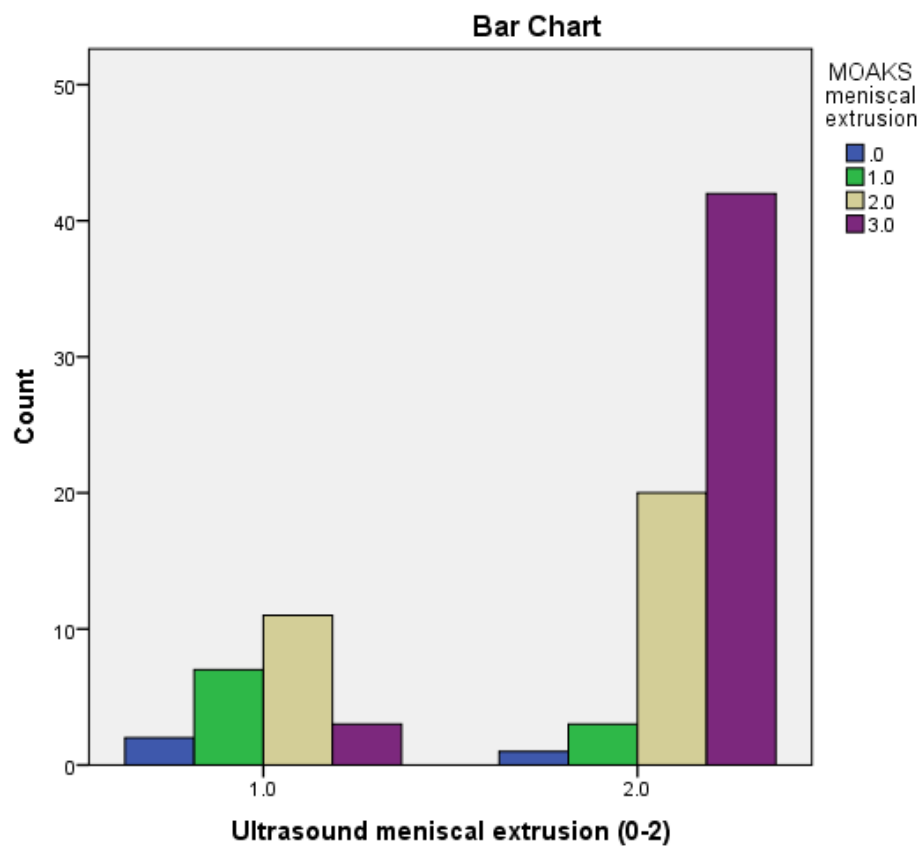

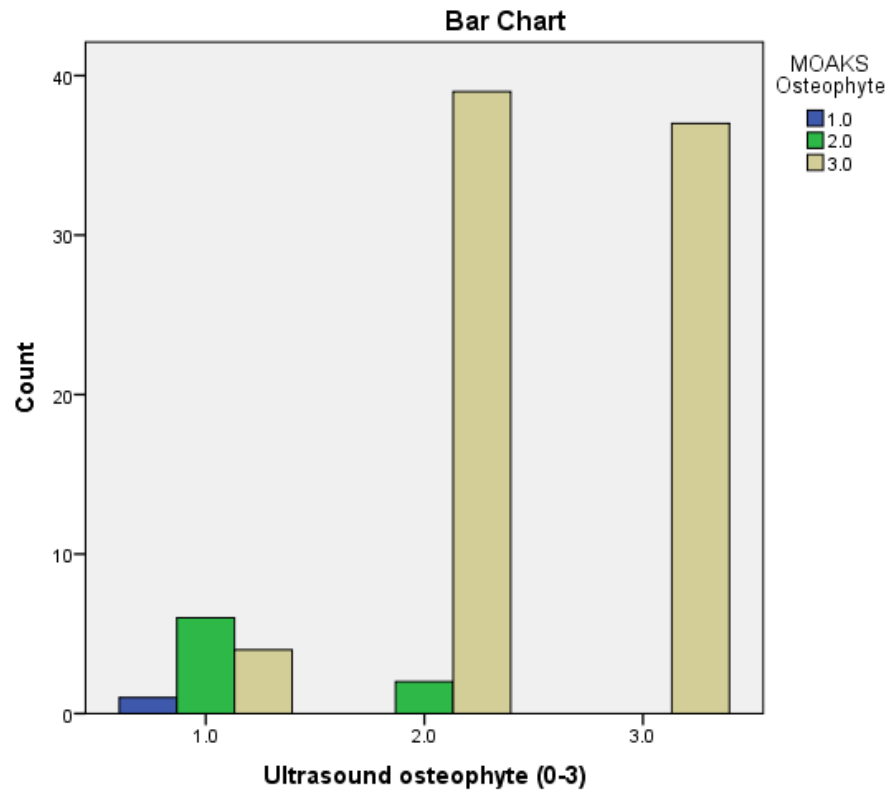



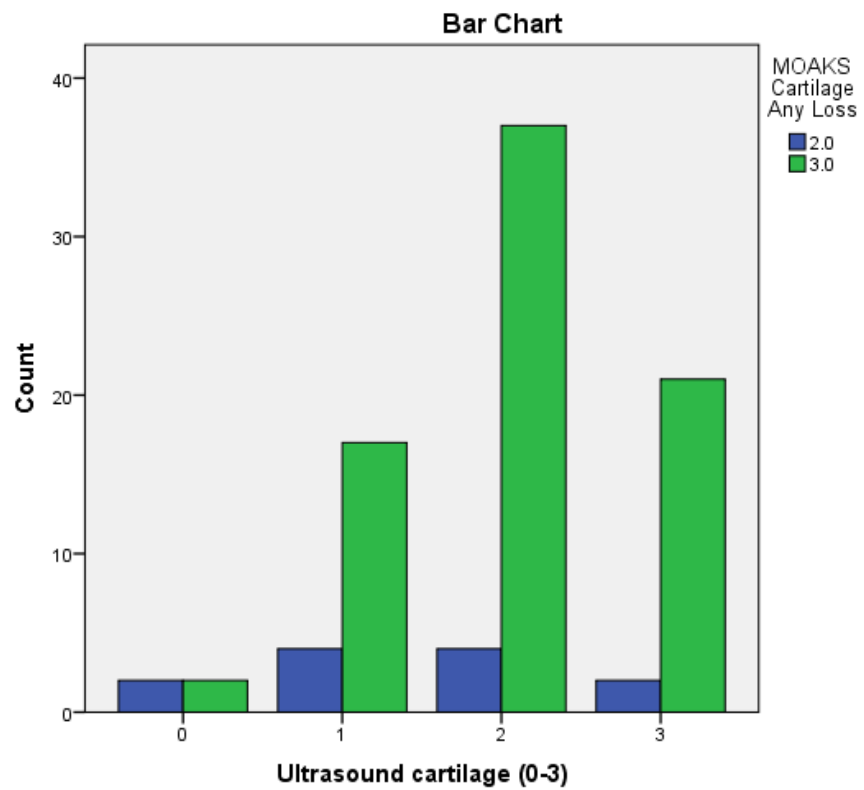

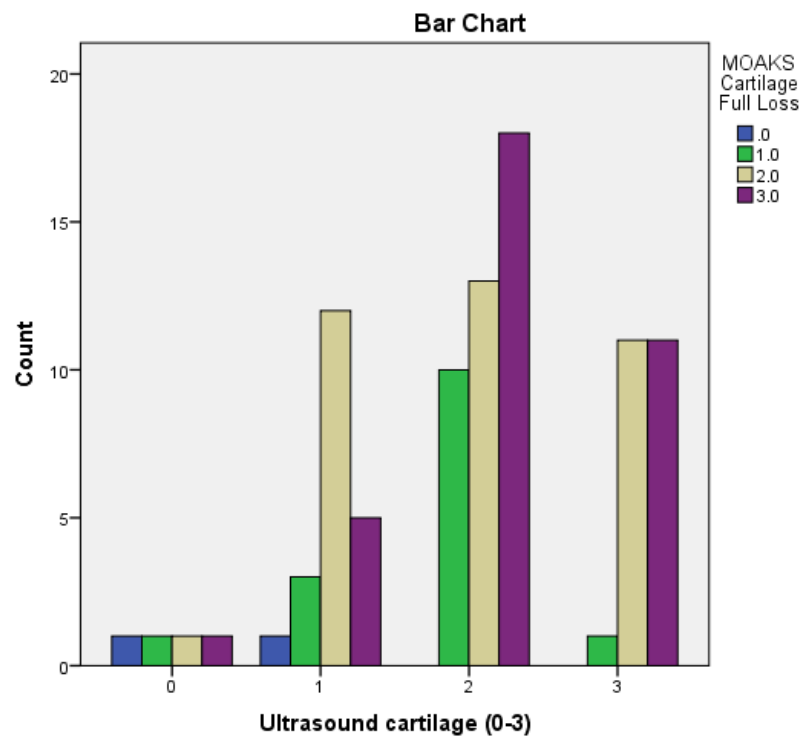

Supplement: 191291DataSuppl.pdf [file 191291DataSuppl.pdf]
